# 1      **Effect of post-activation potentiation on the sports** 2                      **performance of athletes: a systematic review**

3      Jiazhe Li<sup>1</sup>, Kim Goek Soh<sup>1\*</sup>, Su Peng Loh<sup>2</sup>, Shengyao Luo<sup>1</sup>, Marrium Bashir<sup>1</sup>, Xiao  
4      Yu<sup>1</sup>

5      <sup>1</sup>Department of Sports Studies, Faculty of Educational Studies, Universiti Putra  
6      Malaysia, Serdang, Malaysia, <sup>2</sup>Department of Nutrition, Faculty of Medicine and  
7      Health Sciences, Universiti Putra Malaysia, Serdang, Malaysia

8      \* **Correspondence:**

9      **Kim Goek Soh**

10      kims@upm.edu.my

11      Keywords: post-activation potentiation, sports performance, athletes, sport, power

12      **Background:** This study aimed to investigate the effects of post-activation potentiation  
13      (PAP) on sport performance.

14

15      **Methods:** The data used in this study were reported according to the Preferred  
16      Reporting Items for Systematic Reviews and Meta-Analyses 2020 guidelines.  
17      Researchers extracted relevant randomized controlled trials from the available literature  
18      using prominent scientific indexing databases such as EBSCOhost, PubMed, Scopus,  
19      Web of Science, as well as Google Scholar. Ten of the 125 studies that met the inclusion

20 criteria were included. The overall quality of each study was determined using the  
21 PEDro scale. Ten studies had scores ranging from 3 to 5.

22

23 **Results:** In PAP interventions, power (n = 4) was the primary aspect of sports  
24 performance, followed by endurance (n = 1), speed (n = 2), and jumping ability (n = 2).  
25 Meanwhile, PAP significantly affects the power, endurance, speed, and jumping  
26 abilities of athletes in basketball, volleyball, track and field, and soccer.

27

28 **Conclusion:** Compared with conventional training, PAP is a relatively novel dynamic  
29 warm-up routine that can greatly enhance the sports performance of athletes in terms of  
30 endurance, power, speed, and jumping ability. As a phenomenon of rapid increase in  
31 muscle strength and power caused by high-intensity warm-up activities, PAP can help  
32 athletes quickly adjust the physical condition to the best state in the pre-match warm-  
33 up. However, since some study findings did not reflect the effect of PAP on the sports  
34 performance of athletes, more high-quality randomized controlled trials are required to  
35 further prove the effect of PAP. Additionally, the existing evidence does not consider  
36 the effect of PAP on agility and flexibility performance. In formulating the PAP  
37 induction program, it is also necessary to consider the impact of the gender and age of  
38 the inducer, exercise level, pre-stimulation load, and interval time on PAP.

39 **Systematic Review Registration:** [<https://inplasy.com/>], identifier: [INPLASY202330120].

40

41 **1 Introduction**

42 Tian et al. referred to the abilities of athletes in competitions or training sports  
43 performances<sup>1</sup>. This includes the physical fitness, technical and tactical abilities, and  
44 mentality of athletes. Optimal physical fitness is the key to improving technical and  
45 tactical levels and the requirements of athletes in physical training<sup>2</sup>. Zhang reported that  
46 the quality of physical fitness directly determines sports performance, therefore,  
47 enhancing physical fitness is essential for enhanced sports performance by athletes<sup>3</sup>.

48 Physical fitness refers to the essential abilities comprehensively reflected by the  
49 functionality of different organs in muscle activity, including five aspects of quality  
50 such as speed, strength, endurance, agility, and flexibility<sup>4</sup>. Generally speaking, power  
51 can reflect the sports performance of athletes<sup>5-7</sup>, and jumping ability is not only usually  
52 used to measure athlete's power<sup>8</sup>, but also the most reliable and valid way to evaluate  
53 the power of athlete's lower limb<sup>9</sup>. Excellent power of athlete's lower limbs is crucial  
54 to the result of a basketball game as it helps the athletes achieve strong jumping ability  
55 and acceleration during the game<sup>10</sup>.

56 There are many ways to enhance sports performance, such as plyometric training, core  
57 training and integrative neuromuscular training, etc. PAP is one of the most effective.  
58 Post-activation potentiation (PAP) is a phenomenon where voluntary maximal muscular  
59 action induces an acute enhancement of previous exercise<sup>11,12</sup>. This activation enhances  
60 muscle contraction and potentially increases the performance of solid muscles,  
61 particularly in explosion-led sports such as running, jumping, and shooting<sup>13</sup>. The  
62 physiological mechanism underlying PAP remains unclear. Nevertheless, previous  
63 studies have suggested that PAP has three physiological mechanisms: myosin regulating

64 the enhanced phosphorylation of light chain proteins<sup>14,15</sup>, the nervous system promoting  
65 higher-order exercise by increasing unit recruitment, and alterations in muscle fiber  
66 pinnate angles<sup>11,16,17</sup>.

67 The results show that improved phosphorylation of light chain proteins after maximal  
68 (and even submaximal) stimulation results in improved muscle contraction ability<sup>18,19</sup>.

69 This mechanism regulating light chain phosphorylation can make myosin-actin  
70 interactions more sensitive to calcium ions. The myosin light-chain-activating enzyme  
71 produces more adenosine triphosphate in the myosin complex. The frequency of myosin  
72 cross-bridge oscillations then increases; thus, pre-stimulation increases the cross-bridge  
73 power output, which improves exercise performance<sup>14</sup>.

74 Another possible mechanism for the development of PAP is the increased involvement  
75 of the nervous system in skeletal muscle activity, which increases the degree of  
76 synchronous motor fiber contraction and the number of higher-order motor units  
77 involved in the movement<sup>16,20</sup>. Enhanced neural activity may result from increased  
78 motor-unit recruitment, improved motor-unit synchronization, reduced synaptic  
79 inhibition, or increased central nerve impulse inputs<sup>21,22</sup>. Fewer motor neurons control  
80 slow-twitch muscle fibers during pre-stimulation and low-load stimulation exercises.  
81 As the pre-stimulus load increases, higher-order motor units (fast muscles) controlled  
82 by large motor neurons are recruited.

83 Tillin and Bishop suggested that recruiting many higher-order motor units and acting on  
84 the nervous system may be one of the mechanisms of post-activation enhancement<sup>11</sup>.

85 However, changes in the pinnate angle of the muscle fibers may also contribute to the  
86 promotion of PAP. Folland and Williams showed that the pinnate angle affects the force  
87 transmitted by the muscle to the tendons and bones<sup>23</sup>. Because a smaller pinnate angle  
88 decreases force transmission, muscle contraction torque increases as the pinnate angle  
89 decreases. Mahlfeld et al. reported that static maximal voluntary contraction, including  
90 stimulation, can promote pinnate angle reduction<sup>24</sup>. Kumagai et al. suggested that  
91 narrowing the feature angle could enhance sprint speeds in athletes<sup>25</sup>. However, a  
92 previous study showed that a larger feature angle can improve power performance<sup>26</sup>.

93 Benefits of PAP stimulation, such as enhancing sprint performance, jumping ability,  
94 and other strength-related movements, have been reported by several studies<sup>27-34</sup>.  
95 Therefore, for a particular individual, the optimal duration and intensity of PAP  
96 stimulation should be considered, combined with subsequent rest periods, because  
97 fatigue may outweigh the potential benefits if not properly prescribed.

98 PAP is affected by numerous factors during the induction process, such as the pre-  
99 stimulation approach and load, interval time, participant characteristics, and evaluation  
100 techniques<sup>35-38</sup>. Currently, there are many studies on PAP and its influencing factors,  
101 but some studies remain controversial regarding whether PAP can effectively improve  
102 the sports performances of athletes. Additionally, there is still a need for a clear  
103 conclusion on how to effectively induce and maximize the effects of PAP. Liang et al.  
104 suggested that accurate control of the interval time is the key to achieving the best  
105 effect<sup>39</sup>. The window time occurs when PAP is greater than the fatigue effect. Motor  
106 performance improvement caused by PAP appears during two window-opening periods

107 during induction exercises. At the beginning of the induction exercise, there is usually  
108 a window-opening period (first); however, the enhancement effect of PAP is not  
109 apparent due to the current small amount of exercise and intensity, and the duration of  
110 PAP is relatively short. As the exercise load increases, the fatigue effect gradually  
111 increases, which can reduce sports performance when explosive activity is performed.  
112 A few minutes after the end of the induction exercise, as the fatigue effect gradually  
113 subsides, PAP becomes more significant than the fatigue effect. The second window-  
114 opening period is when sports performance improves most significantly.

115 As shown in Fig 1, the enhancement effect of PAP in the second window-opening period  
116 is more evident than that in the first, and the second window also lasts longer than the  
117 first window<sup>11</sup>. Tillin and Bishop suggested that PAP was the "potential difference"  
118 between the enhancement and fatigue effects after the induced exercise stimulated the  
119 muscle<sup>11</sup>. Only when the PAP is higher than the fatigue effect will the muscle  
120 contraction traces significantly improve the subsequent performances of athletes. The  
121 timing, duration, and intensity of PAP depend on the balance between enhancement and  
122 fatigue effects, which affects a series of factors. Therefore, this study adopted a  
123 systematic review method to analyze experimental research reports on the impact of  
124 PAP on the sports performance of professional or amateur athletes. This study also aims  
125 to test the exact effect of PAP on the different performance indicators of the athletes'  
126 sports performance and provide a reference for the training practices of athletes in  
127 different sports.

128

129 **Fig 1.** Relationship of post-activation potentiation with fatigue<sup>11</sup>. **Descriptive text :** Fig1 provides a model that  
130 introduces the hypothesized relationship between PAP and fatigue, with PAP dominating more than fatigue when the pre-  
131 activation(condition) intensity is low, followed by a rapid increase in muscle movement during subsequent reinforcemen (post/pre)  
132 (window 1). As the pre-activation intensity increases, fatigue becomes dominant, negatively affecting subsequent sports performance.  
133 Following the pre-activation, fatigue dissipates at a faster rate than PAP, and a potentiation of subsequent enhanced performance can  
134 be realized at some point during the recovery phase (window 2).

135

## 136 **2 Materials and Methods**

### 137 **2.1 Protocol and Registration**

138 TABLE 1 | PICOS Eligibility criteria.

| PICOS        | Detailed Information                                                                        |
|--------------|---------------------------------------------------------------------------------------------|
| Population   | Healthy players                                                                             |
| Intervention | Post-activation potentiation                                                                |
| Comparison   | Single-group trials, Two groups, and Three groups                                           |
| Outcome      | Include post-activation potentiation with various kinds of sports performance among players |
| Study Design | Single-group Trials or Randomized Controlled Trials                                         |

139

140 This study used the Preferred Reporting Items for Systematic Reviews and Meta-  
141 Analyses (PRISMA) framework to gather and assess data. It was registered in  
142 INPLASY (registration number: INPLASY202330120, DOI number: 10.37766/inplasy  
143 2023.3. 0120)<sup>40</sup>.

### 144 **2.2 Search Strategy**

145 Popular scientific databases were used to search for relevant literature, including  
146 Ebscohost, PubMed, Scopus, Web of Sciences, as well as Google Scholar, up to October  
147 10, 2022. For each independent search engine, the title and abstract were used as  
148 strategic search queries. The main keywords used for collecting relevant research works  
149 were: (“PAP” OR “Post-activation potentiation” OR “Pre-activation” OR “Pre-  
150 conditioning”) AND (“Sports Performance” OR “Athletic Performance” OR “Power”  
151 OR “Endurance” OR “Jumping Ability” OR “Agility” OR “Speed” OR “Flexibility”)  
152 AND (“Athlete\*” OR “Player\*” OR “Sportsman\*” OR “Sportswoman\*” OR  
153 “Sportsperson\*” OR “Jock\*”).

### 154 **2.3 Eligibility Criteria**

155 The population (P), intervention (I), comparison (C), outcome (O), and study design (S)  
156 (PICOS) model was used in the literature. Each PICOS factor was used as an inclusion  
157 criterion for the retrieved publications. We included studies that met the following  
158 inclusion criteria: (P) The study population consisted of professionally trained and  
159 untrained healthy personnel, regardless of gender or age; (I) PAP should be isolated and  
160 expressly discussed, with PAP in the experimental group and other training methods  
161 compared to no training in the control group; (C) The comparisons in this study involved  
162 both single- and multiple-group trials; (O) The findings of this study revealed at least  
163 one post-activation performance enhancement effect in athletes; and (S) All  
164 experimental designs included in the literature were randomized controlled trials.

### 165 **2.4 Study Selection**



166 Two authors individually selected the studies that met the inclusion criteria. The  
167 abstracts and titles of studies were assessed to identify those that could be incorporated  
168 into the study. In response to a debate between the two authors regarding the selection  
169 of a paper, an additional author was requested to assess the entire work before arriving  
170 at a definitive conclusion.

## 171 **2.5 Data Extraction and Quality Assessment**

172 After the screening, we acquired the following crucial data from several eligible studies:  
173 (1) author name and publication year; (2) demographic characteristics such as the  
174 number, type, gender, and age of the participants; (3) intervention characteristics such  
175 as the type and measurement indicators, interval time, and duration; and (4) study  
176 results.

177 The PEDro scale is a valid indicator of the methodological quality of systematic reviews  
178 owing to its high validity and reliability<sup>41</sup>. There were 11 items on the scale, with scores  
179 ranging from 0 to 10. Two independent raters scored the 11 items as "yes" (1 point) or  
180 "no" (0 point). A third rater addressed any discrepancies in the rating procedure.

181 However, eligibility criteria were not factored into the overall external validity scores.  
182 The total PEDro score ranged from 0 to 10. The higher the grade, the higher the quality  
183 of the method. The quality of the method is proportional to its PEDro score. Studies  
184 rated 8 to 10 were regarded as methodologically superior. Studies rated 5 to 7 were of  
185 high quality, those rated 3 to 4 were of average quality, and those ranked below 3 were

186 of poor quality<sup>42</sup>. Overall, the scientific evidence was evaluated based on three levels:  
187 quantity, methodological quality, and consistency of research findings.

188 Generally, substantial evidence provides consistent information regarding the number  
189 and results of multiple studies. Moderate evidence when a single study exists or when  
190 information from multiple studies is inconsistent. There is no evidence when there are  
191 no case-control studies available.

192

### 193 **3 Results**

#### 194 **3.1 Study Selection**

195 Fig 2 illustrates the literature filtering technique. After the initial evaluation, 120 studies  
196 were retrieved. This number was determined after Endnote software deleted duplicate  
197 studies, followed by a second round of removal that included three non-full-text papers,  
198 two non-English studies, and nine non-journal studies. In the third screening phase, 106  
199 full-text studies were evaluated for eligibility. Of these, 89 were excluded because they  
200 did not satisfy the inclusion criteria for the randomized controlled trial; four were  
201 excluded because they were irrelevant to the topic; and three were discarded. The  
202 qualitative analysis examined ten relevant publications that met the inclusion criteria.

203 **Fig 2.** The search, screening and selection processes for suitable studies—based on  
204 PRISMA<sup>43</sup>. Descriptive text: Fig 2 depicts the literature review process.

205

## 206 3.2 Study Quality Assessment

207 The PEDro scale scores for each study are presented in Table 2. All study data were  
208 evaluated on a 3- to 5-point PEDro scale, penalizing for assignment concealment,  
209 blinding the evaluator, participants, therapists, and intent-to-analyze criteria. The  
210 intervention in this study involved resistance training, which can be challenging for  
211 blind participants, evaluators, and clinicians and carries the risk of sports injuries and  
212 professional misconduct. However, our study ensured that all participants were treated  
213 equally. Two studies with scores of less than four were disqualified<sup>44,45</sup>.

214

215

216

217

218

TABLE 2 | Summary of methodological quality assessment scores.

| Study                  | Eligibility<br>Criteria | Random<br>Allocation | Allocation<br>Concealment | Baseline<br>Comparability | Blind<br>Participants | Blind<br>Therapist | Blind<br>Assessor | Follow-<br>Up | Intention to<br>Treat<br>Analysis | Between<br>Group<br>Comparisons | Point<br>Measure and<br>Variability | Total PEDro<br>Score |
|------------------------|-------------------------|----------------------|---------------------------|---------------------------|-----------------------|--------------------|-------------------|---------------|-----------------------------------|---------------------------------|-------------------------------------|----------------------|
| Marco et al. (2019)    | 0                       | 0                    | 0                         | 0                         | 0                     | 0                  | 0                 | 1             | 0                                 | 1                               | 1                                   | 3                    |
| Lamberto et al. (2022) | 1                       | 1                    | 0                         | 1                         | 0                     | 0                  | 0                 | 1             | 0                                 | 1                               | 1                                   | 5                    |
| Jonathan et al. (2019) | 0                       | 0                    | 0                         | 1                         | 0                     | 0                  | 0                 | 1             | 0                                 | 1                               | 1                                   | 4                    |
| Danny et al. (2017)    | 0                       | 0                    | 0                         | 0                         | 0                     | 0                  | 0                 | 1             | 0                                 | 1                               | 1                                   | 3                    |
| Mariola et al. (2020)  | 0                       | 0                    | 0                         | 1                         | 0                     | 0                  | 0                 | 1             | 0                                 | 1                               | 1                                   | 4                    |
| Joseph et al. (2010)   | 0                       | 0                    | 0                         | 1                         | 0                     | 0                  | 0                 | 1             | 0                                 | 1                               | 1                                   | 4                    |
| Matthew et al. (2010)  | 1                       | 1                    | 0                         | 1                         | 0                     | 0                  | 0                 | 1             | 0                                 | 1                               | 1                                   | 5                    |
| Jameson et al. (2014)  | 1                       | 1                    | 0                         | 1                         | 0                     | 0                  | 0                 | 1             | 0                                 | 1                               | 1                                   | 5                    |
| Mauro et al. (2018)    | 1                       | 0                    | 0                         | 1                         | 0                     | 0                  | 0                 | 1             | 0                                 | 1                               | 1                                   | 4                    |
| Ceith et al. (2017)    | 1                       | 1                    | 0                         | 0                         | 0                     | 0                  | 0                 | 1             | 0                                 | 1                               | 1                                   | 4                    |

TABLE 3 | Population, Intervention and Main outcome.

| Study                  | Population |                            | Intervention |                                            |                                                                                                                 |                                                                                                                      |             | Interval Time                                                                          | Main outcome |
|------------------------|------------|----------------------------|--------------|--------------------------------------------|-----------------------------------------------------------------------------------------------------------------|----------------------------------------------------------------------------------------------------------------------|-------------|----------------------------------------------------------------------------------------|--------------|
|                        | N          | Type of athletes           | Gender       | Age (y)                                    | Type                                                                                                            | Skill measured index                                                                                                 |             |                                                                                        |              |
| Jonathan et al. (2019) | 12         | Endurance-trained athletes | Male         | 28.3 ± 1.37                                | EG: Band-resisted squat jumps or Running-specific warm-up (control condition)                                   | ITT, EMG, Evoked contractile properties, Potentiated Twitch Force Properties, DJ, HR, RPE, MVIC plantar flexor force | 0min        | ITT↔, EMG↔, Evoked contractile properties↔, MVIC plantar flexor force↔, DJ↔, RPE↔, HR↑ |              |
| Mariola et al. (2020)  | 16         | Basketball player          | -            | 23.6 ± 4.4                                 | EG: 5%of body mass-resisted or assisted conditioning                                                            | 5m slide-step movement performance                                                                                   | 6min        | 5m slide-step movement performance↑                                                    |              |
| Matthew et al. (2010)  | 16         | Volleyball athletes        | Mixed        | Female: 19.14 ± 0.38<br>Male: 20.86 ± 1.77 | EG1~4: Back squat or hang clean                                                                                 | VJ<br>GRF                                                                                                            | 4 and 5 min | VJ↑, GRF↔                                                                              |              |
| Joseph et al. (2011)   | 10         | Rugby players              | Male         | 20.4 ± 0.8                                 | EG: Isometric (ISO), concentric (CON), eccentric (ECC), or concentric–eccentric (DYN) conditioning contractions | PP<br>PF<br>Dmax<br>RFD                                                                                              | 12min       | PP↔, PF↔, Dmax↔, RFD↔                                                                  |              |
| Lamberto et al. (2022) | 11         | volleyball players         | -            | 22.6 ± 3.5                                 | EG: Back squat<br>CG: Routine warm-up                                                                           | CMJ height                                                                                                           | 8min        | CMJ height↑                                                                            |              |

|                       |    |                          |      |               |                                         |                          |      |                             |
|-----------------------|----|--------------------------|------|---------------|-----------------------------------------|--------------------------|------|-----------------------------|
| Ceith et al. (2017)   | 10 | Track and field Athletes | Male | 19.3<br>±1.25 | EG: Plyometric exercise                 | 20m sprint<br>40m sprint | 5min | 20m sprint↑,<br>40m sprint↑ |
| Jameson et al. (2014) | 22 | Soccer players           | -    | 23<br>±4.5    | EG: Squat<br>CG: Routine warm-up        | CMJ PP<br>Jump height    | 4min | CMJ PP↔,<br>Jump height↔    |
| Mauro et al. (2013)   | 12 | Soccer players           | Male | 23<br>±5      | EG: plyometric and sled towing exercise | CMJ height               | 2min | CMJ height ↑                |

↑ , significant within-group improvement from pretest to post-test; ↔, non-significant within-group change from pretest to post-test; M, Male; yr, year; Mixed, Male and Female; NR, not reported; CG, control group; EG, experimental group; CMJ, vertical counter movement jump; VJ, vertical jump; Dmax, maximum distance; RFD, rate of force development; PP, peak power; PF, peak force; RPE, Rating of perceived exertion; HR, Heart rate; GRF, Ground reaction force; ITT, interpolated twitch technique; EMG, Electromyograph; Evoked contractile properties, Potentiated Twitch Force Properties, MVIC, maximum voluntary isometric contractions; plantar flexor force, DJ, 30-cm Drop jump; EOL, eccentric overload; ISO, Isometric; CO, concentric; ECC, eccentric; DYN, concentric–eccentric

### 224 **3.3 Participant Characteristics**

225 Table 3 provides the details of the participants in the studies that met the inclusion  
226 criteria.

227 1. Classification of athletes. Among the 8 studies, two were on soccer  
228 players<sup>46,47</sup>; two on volleyball players<sup>48,49</sup>; one on basketball players<sup>50</sup>; and  
229 the remaining five on rugby<sup>51</sup>, track and field<sup>52</sup> and endurance-trained  
230 athletes<sup>53</sup>.

231 2. Gender, Number, and Age. The study included a total of 109 participants,  
232 including 52 males and eight females, with gender details not provided for  
233 the remaining 49 participants<sup>46,48,50</sup>. The studies reported the age range of the  
234 participants as being between 16 and 29 years old.

### 235 **3.4 Intervention Characteristics**

236 The eight included intervention characteristics were reported based on several  
237 properties:

238 1. Mode of pre-stimulus. Three studies selected back squats<sup>46,48,49</sup>; one study  
239 used a squatted jump<sup>53</sup>; and another study used a bench press as pre-stimulus  
240 modes<sup>51</sup>. The plate jump method was used for pre-stimulation<sup>52</sup>. The pre-  
241 stimulus mode chosen by Mauro et al. was more complicated, combining  
242 plyometric exercises and sled towing, whereas Mariola et al. adopted a

243 consistent pre-stimulus mode with the test method<sup>47,50</sup>.

244 2. Pre-stimulus intensity. Lamberto et al. chose a high-intensity load of three  
245 sets of 90% repetition maximum (RM) (1RM), and two studies chose a  
246 relevant load intensity: four sets of 5RM, three sets of 3RM, and one set of  
247 3RM<sup>48,51,53</sup>. Matthews et al. reported a mixture of moderate- and maximum-  
248 intensity stimulations consisting of five sets of 50% 5RM and five sets of  
249 80% 5RM back squats<sup>49</sup>. Additionally, two studies reported stimulation with  
250 lower loads: one set of 3RM and a mass of 11.2 kilograms, respectively<sup>46,52</sup>.

251 Another study reported that the pre-stimulation modality is relatively  
252 complicated. The conditioning stimulus comprised two sets of 15 ankle  
253 hops, three sets of five hurdle hops, and three sets of 20-meter sprints and  
254 sled towing, amounting to 45 jumps and 60 meters of sprinting with an  
255 external load<sup>47</sup>.

256 3. Interval time. These studies tested the measures every 2 minutes, 4 minutes ,  
257 4 and 5 minutes and 5 minutes, 6 minute, 8 minutes, 12 minutes after pre-  
258 stimulation. Notably, only one study reported no rest interval (0 minute)<sup>46-53</sup>.

259

### 260 3.5 Outcome



261 The results of this study were grouped according to the impact of PAP on athletic  
262 performance. The authors of this study independently categorized studies based on other  
263 research areas. The staging was passed, and discussions between the authors were  
264 resolved until a consensus was reached through consultation.

### 265 **3.5.1 Effect of PAP on Power**

266 Among the eight studies included in this review, six reported<sup>46–49,51,53</sup>. The aspects  
267 valued and assessment tools used were the reactive strength index test, power  
268 performance test (peak power [ $P_{\text{peak}}$ ], maximum distance [ $D_{\text{max}}$ ], peak force [ $F_{\text{peak}}$ ], and  
269 rate of force development [RFD]), and countermovement jump test (jump height,  
270 ground reaction force [GRF], and  $P_{\text{peak}}$ )<sup>46,49,51,53</sup>. The participants included 12 healthy  
271 endurance-trained athletes, ten male competitive rugby athletes, 16 mixed-gender  
272 volleyball athletes, 11 national Superliga-2 volleyball players, 12 professional male  
273 soccer players, and 22 senior professional soccer players<sup>46–49,51,53</sup>.

274 On the one hand, two studies examined the effect of post-activation potentiation on  
275 power among 27 volleyball athletes<sup>48,49</sup>. The result of the first group investigated the  
276 condition that produced the greatest increase in vertical jump height, which resulted in  
277 an average increase of 5.7% ( $2.72 \pm 1.21$  cm;  $p < 0.001$ ), but there was no significant  
278 difference in peak GRF ( $p > 0.05$ )<sup>49</sup>. Meanwhile, another study revealed that there was  
279 a significant improvement among the control group and experimental group from PAP  
280 ( $35.40 \pm 3.69$  vs.  $29.61 \pm 4.10$  cm;  $p < 0.05$ ), pre-Match ( $37.10 \pm 4.09$  vs.  $31.38 \pm 3.99$

281 cm;  $p < 0.05$ ), Set 1 ( $38.84 \pm 4.74$  vs.  $31.22 \pm 2.61$  cm;  $p < 0.05$ ), Set 2 ( $41.37 \pm 4.91$  vs.  
282  $32.75 \pm 4.47$  cm;  $p < 0.05$ ). Additionally, a significant improvement was observed in the  
283 countermovement jump test in the experimental group between baseline (pre-PAPE)  
284 and all the following tests: post-PAPE (+1.3 cm), pre-match (+3.0 cm), Set 1 (+4.8 cm),  
285 Set 2 (+7.3 cm), Set 3 (+5.1 cm), Set 4 (+3.6 cm), and Set 5 (+4.0 cm). The jump height  
286 in the control group was lower than that in the experimental group<sup>48</sup>.

287 On the other hand, two studies were related to soccer power performance, involving 34  
288 professional soccer players<sup>46,47</sup>. The first group of studies investigated the impact of  
289 PAP on power by using a countermovement jump test on 12 professional male soccer  
290 players<sup>47</sup>. The authors concluded that PAP could significantly improve  
291 countermovement jump height in soccer athletes at T1, T3, and T5 (expressed in  
292 minutes) under caffeine conditions (5.07%, 5.75%, and 5.40% increase, respectively;  $p$   
293  $< 0.01$ ) compared to baseline.

294 In addition, one study found no statistically significant differences in the  
295 countermovement leap test ( $P_{\text{peak}}$ ,  $p > 0.05$  and jump height,  $p > 0.05$ )<sup>46</sup>. Meanwhile, in a  
296 different study, PAP produced by isometric (ISO) training was substantially greater ( $587$   
297  $\pm 116$  and  $605 \pm 126$  W for pre- and post-ballistic bench press throw, respectively;  $p$   
298  $> 0.05$ ). And there was no significant differences in  $P_{\text{peak}}$  for concentric (CON),  
299 eccentric (ECC), and concentric-eccentric (DYN) ( $p > 0.05$ ), and there were no significant  
300 differences existed in  $F_{\text{peak}}$ ,  $D_{\text{max}}$ , and RFD ( $p > 0.05$ ) for ISO, CON, ECC, and DYN.  
301 And no significant improvement in EMG were found between pre- and post-BBPT for

302 all of the pre-activation mode<sup>51</sup>. In addition, One study revealed that PAP had a positive  
303 effect on the reactive strength index ( $p = 0.035$ ; 3.6%) compared with control  
304 conditioning<sup>53</sup>.

305

### 306 **3.5.2 Effect of PAP on Speed**

307 Speed was considered in two of the eight studies included in this review<sup>50,52</sup>. The  
308 measurement tools were a 5-meter slide-step movement test and 20- and 40-meter sprint  
309 tests. The participants included 16 basketball players and ten male track and field  
310 athletes <sup>50,52</sup>. One study investigated two exercise protocols, namely, assisted and  
311 resisted conditioning ability (CA), each comprising four sets of 10-meter slide-step  
312 movement with a body mass external load of 5% and one-minute rest intervals. The  
313 result indicated a statistically significant difference between baseline and post-assisted  
314 post-activation performance enhancement for the experiment group in the 5-meter slide-  
315 step movement time ( $3.09 \pm 0.16$  vs.  $3.24 \pm 0.15$  s;  $p < 0.05$ ). However, the other exercise  
316 protocol reported no significant difference between baseline and post-intervention after  
317 the resistance CA ( $3.23 \pm 0.15$  vs.  $3.17 \pm 0.13$  s;  $p = 0.230$ )<sup>50</sup>. Additionally, Ceith et al.  
318 observed a decrease in sprint time when PAP in the form of a plyometric was performed  
319 during warm-up for both 20-meter sprints ( $3.134$  vs.  $3.172$  s;  $p < 0.05$ ) and 40-meter  
320 sprints ( $5.337$  vs.  $5.405$  s;  $p < 0.01$ )<sup>52</sup>.

### 321 **3.5.3 Effect of PAP on Endurance**

322 Only one study included in this systematic review investigated the relationship between  
323 PAP and endurance performance<sup>53</sup>. The time it took 12 endurance-trained male athletes  
324 ( $28.33 \pm 1.37$  years) to complete the time-trial test determined their endurance. Jonathan  
325 et al. reported that PAP stimulus decreased the time required to run by 3.6% ( $p = 0.07$ )  
326 and 8% ( $p = 0.014$ ) over a distance of one kilometer<sup>53</sup>.

327

## 328 **4 Discussion**

### 329 **4.1 Effect of PAP on Power**

330 Power determines sports performance<sup>54</sup>. Meanwhile, in studies of power performance,  
331 jumping performance is a measure method that frequently is used<sup>55</sup>. Studies have shown  
332 that PAP can be generated through induction training, thereby improving performance  
333 in explosive sports. Based on the six studies that analyzed the effectiveness of PAP in  
334 improving the power performance of athletes, we draw firm conclusions. Three studies  
335 indicated that PAP can improve the power performance of athletes, which is consistent  
336 with the findings of Gourgoulis et al. and Webber et al.<sup>47,48,53,56,57</sup>. However, further  
337 studies are required to support the idea that PAP can improve the power performance of  
338 athletes.

339 Joseph et al. proposed several power evaluation methods, such as  $P_{\text{peak}}$ ,  $F_{\text{peak}}$ ,  $D_{\text{max}}$ , and  
340 RFD<sup>51</sup>. Several different PAP activation methods such as ISO, CON, ECC, or DYN  
341 conditioning contractions were used, in which the effects of PAP produced by ISO  
342 conditioning contractions showed a significant increase in  $P_{\text{peak}}$ , but no significant  
343 differences in  $P_{\text{peak}}$  were found for CON, ECC, or DYN conditioning contractions.  $F_{\text{peak}}$ ,  
344  $D_{\text{max}}$ , and RFD did not differ significantly among the ISO, CON, ECC, and DYN  
345 groups. This result may be primarily attributable to the time interval and pre-stimulus  
346 interaction of PAP<sup>58,59</sup>. Matthews et al. found a significant increase in vertical leap  
347 height but no difference in peak GRF<sup>49</sup>. This result may be due to the various training  
348 experiences and pre-stimulation load intensities of the participants<sup>60,61</sup>.

349 In addition, Jameson et al. reported that no effect was observed for  $P_{\text{peak}}$  or jump  
350 height during experimental group trials<sup>46</sup>. Baechle and Earle reported that this was likely  
351 due to the determination by 3RM of the participants and testing within the same day,  
352 which resulted in fatigue of the central nervous system<sup>62</sup>. At the same time, this result  
353 is similar to that of Khamoui et al., who suggested that PAP did not significantly  
354 improve sports performance<sup>63</sup>. The reason for this may be that when the activation  
355 method is inconsistent with the specific movement of the athlete, it destroys the  
356 neuromuscular contraction memory of the particular exercise in the previous session,  
357 which adversely affects subsequent sports performance and fails to activate PAP<sup>63</sup>.

358

## 359 **4.2 Effect of PAP on Speed**

360 Of the eight studies included in this review, two involved speed tests, and both  
361 consistently suggest that PAP can improve the speed performance of athletes<sup>50,52</sup>.  
362 Studies have also shown that PAP can improve rapid skeletal muscle strength, and  
363 increased neural activation of motor units during the potentiation phase may be the  
364 primary reason for the enhanced speed performance, which is consistent with the  
365 findings of Healy and Comyns and Lesinski et al.<sup>64,65</sup>. Notably, Mariola et al. reported  
366 a new finding that only 5% of body mass-assisted CA significantly enhanced the overall  
367 performance of the slide-step movement<sup>50</sup>. However, some previous studies, including  
368 Comyns et al., Crewther et al., and McBride et al., concluded that lower stimulus loads  
369 were not effective in increasing sprint speed<sup>66-68</sup>. In contrast, some other studies have  
370 reported that light-resistance-assisted conditioning can effectively elicit potentiation<sup>69-</sup>  
371 <sup>71</sup>.

372 In response to this change, Ceith et al. suggested that low-intensity pre-stimulation  
373 would produce sufficient central nervous system stimulation without leading to a high  
374 degree of fatigue<sup>52</sup>. PAP is a personalized and complex phenomenon. Although two  
375 studies have shown that PAP can improve speed performance in athletes, due to the  
376 absence of physiological analysis, the cause of these changes has yet to be identified or  
377 explained. PAP can be affected by the gender, age, muscle fiber type, and training  
378 experience of the participants<sup>72-74</sup>. Moreover, the electromyograph of stimulated

379 muscles has not been studied with kinematic and kinetic data analysis. The assessment  
380 of performance changes based on a single resistive value makes it difficult to draw  
381 definitive conclusions. Therefore, when formulating a PAP plan, individual differences  
382 among athletes and the diversity of various movements should be considered. The  
383 activation method and load intensity should be arranged according to the characteristics  
384 of the athletes and special projects to minimize the factors that may negatively affect  
385 PAP.

#### 386 **4.3 Effect of PAP on Endurance**

387 According to a study by Jonathan et al., PAP may help endurance athletes improve their  
388 endurance performance and neuromuscular properties during long-distance running,  
389 which is supported by Silva et al. and Feros et al.<sup>53,75,76</sup>. Both studies confirmed that  
390 PAP significantly affected endurance performance. Several studies have shown that the  
391 skeletal muscles can adjust peripherally to reduce fatigue and improve exercise  
392 performance<sup>77,77,78</sup>. This adjustment may explain why PAP improves endurance  
393 performance in athletes.

394 It should be noted that the participants in this study were endurance-trained athletes, so  
395 the difference in PAP or fatigue effect among muscle phenotypes can be more  
396 pronounced since only slow-twitch fibers can maintain Ca<sup>2+</sup> sensitivity after prolonged  
397 endurance activity and after appropriate CA<sup>79</sup>. The more potent antifatigue properties  
398 of long-term skeletal muscle training may produce a more intense strengthening effect.

399 Therefore, the included studies only reported the effects of PAP on athletes with  
400 endurance training experience, which is an essential gap in the literature. Athletes with  
401 different characteristics have different effects due to the influence of PAP. Therefore, it  
402 is necessary to consider individual differences among athletes in research on the effects  
403 of PAP on endurance performance and to develop specific PAP programs.

404

## 405 **5 Limitation**

406 Although this study offers evidence to assess the effects of PAP on sports performance,  
407 some of the weaknesses revealed by its limitations are as follows: First, according to the  
408 currently retrieved studies, this work on the effect of PAP on the sports performance of  
409 athletes can only be limited to the effect of PAP on their physical fitness and does not  
410 involve studies on their skill performance or performance throughout the game. Second,  
411 the training level of athletes is often evaluated as a moderating factor affecting the effect  
412 of PAP. The data from PAP studies in the existing literature is all based on the training  
413 experience of the athletes to reflect their training level, never considering aerobic or  
414 anaerobic capacity. Jones et al. suggested that recovery from fatigue after pre-  
415 stimulation is an aerobic phenomenon, creating a gap in existing research<sup>80</sup>. Third,  
416 studies have demonstrated that PAP stimulation leads to fatigue. Skeletal muscle fatigue  
417 and strength enhancement coexisted during PAP induction. A short interval produces a  
418 good effect of PAP only if the degree of fatigue is within the enhancement effect<sup>81,82</sup>.



419 Fourth, the content of each training objective in the included literature varied, and the  
420 evaluation methods were diverse, making it impossible to conduct an in-depth analysis  
421 of the intensity and quantity of the intervention. Fifth, as the existing literature is based  
422 on athletes with training experience, the results of these studies cannot provide a  
423 reference for untrained participants. The existing literature is based on male athletes,  
424 and there is only one study with mixed genders; therefore, the results of these studies  
425 lack research on the impact of female athletes on sports performance. In addition,  
426 existing literature does not consider the effect of PAP on agility and flexibility  
427 performance. Whether PAP improves the agility and flexibility of athletes requires  
428 further research.

## 429 **6 Conclusion**

430 This review reported that PAP can be effectively induced by either high-intensity or  
431 medium- and low-intensity induction, and rest intervals between 2 to 8 minutes can  
432 significantly improve the sports performance of the subjects.

433 In addition, existing studies provides evidences that PAP can improve athletic power,  
434 speed and endurance performance. Traditional warm-up methods such as jogging and  
435 stretching have been proven to have limited effects on improving athletes' sports  
436 performance. Adding PAP to the pre-match warm-up can enhance the muscle working  
437 ability of athletes in a specific time period and improve sports performance. However,  
438 PAP improves sports performance, the outcomes could be a result of factors like gender

439 and age, type of muscle fiber, training status, and the training level of the athletes. At  
440 the same time, the optimal interval time for PAP has yet to be determined. Therefore,  
441 different intervals lead to different conclusions in the existing literatures.

442 When formulating an induction PAP program, it is crucial to investigate the influence  
443 of individual differences in participants on the effect of PAP. Therefore, researchers  
444 must continue to explore these gaps to develop more scientific training plans. This study  
445 recommends that trainers and researchers consider the effects of the motor  
446 characteristics of the individuals and their differences in PAP when designing pre-  
447 stimulation protocols for PAP.

## 448 **7 Conflict of Interest**

449 The authors declare that the research was conducted in the absence of any commercial  
450 or financial relationships that could be construed as a potential conflict of interest.

## 451 **8 Author Contributions**

452 JL drafted the article. JL and KS provided data interpretation. KS critically revised the  
453 article and gave the final approval. All the authors read and approved the final  
454 manuscript.

## 455 **References**

- 456 1. Tian M. Sports Training. Beijing: Beijing Sport University Press, 2000
- 457 2. Li C. Design and implementation of physical training for Chinese national badminton team in preparation for 2012

- 458 London Olympic Games. Journal of Beijing Sport University. 2016; 39(5):86-91. doi: 10.19582/j.cnki.11-378
- 459 5/g8.2016.05.015
- 460 3. Zhang, F. (2020). Strengthening flexibility and improving physical function-research on flexibility training methods for
- 461 adolescent track and field athletes. Track and Field. (08), 55-56. Available at: [https://www.cnki.co](https://www.cnki.com.cn/Article/CJFDTOTAL-TJTJ202008040.htm)
- 462 [m.cn/Article/CJFDTOTAL-TJTJ202008040.htm](https://www.cnki.com.cn/Article/CJFDTOTAL-TJTJ202008040.htm)
- 463 4. Yuan, W. Sports science dictionary. Beijing: Higher Education Press. 2000; 12:237
- 464 5. Carlock JM, Smith SL, Hartman MJ, et al. The Relationship Between Vertical Jump Power Estimates and Weightlifting
- 465 Ability: A Field-Test Approach. The Journal of Strength & Conditioning Research. 2004;18(3): 534. doi: 10.1519/R-
- 466 13213.1
- 467 6. Boulosa DA, Abreu L., Beltrame LGN, and Behm DG. The acute effect of different half squat set configurations on
- 468 jump potentiation. The Journal of Strength & Conditioning Research, 2013; 27(8):2059 – 2066. doi: 10.1519/J
- 469 SC.0b013e31827ddf15.
- 470 7. Shalfawi SA, Sabbah A, Kailani G, Tønnessen E, & Enoksen E. The relationship between running speed and measures
- 471 of vertical jump in professional basketball players: a field-test approach. The Journal of Strength & Conditioning
- 472 Research. 2011; 25(11):3088 – 3092. doi: 10.1519/JSC.0b01
- 473 3e318212db0e
- 474 8. Slinde F, Suber C, Suber L, Edwén CE, Svantesson U. Test-retest reliability of three different countermovement
- 475 jumping tests. The Journal of Strength & Conditioning Research. 2008; 22(2):640-644. doi :10.1519/JSC.0b013e3181
- 476 660475
- 477 9. Markovic G, Dizdar D, Jukic I, Cardinale M. Reliability and factorial validity of squat and countermovement jump
- 478 tests. The Journal of Strength & Conditioning Research. 2004; 18(3): 551-555.

- 479 10. Castagna C, Chaouachi A, Rampinini E, Chamari K, Impellizzeri F. Aerobic and explosive power performance of elite  
480 Italian regional-level basketball players. *The Journal of Strength & Conditioning Research*. 2009; 23(7): 1982  
481 -1987. doi: 10.1519/JSC.0b013e3181b7f941
- 482 11. Tillin NA, Bishop D. Factors Modulating Post-Activation Potentiation and its Effect on Performance of Subsequent  
483 Explosive Activities: *Sports Medicine*. 2009; 39(2):147-166. doi: 10.2165/00007256-200939020-00004
- 484 12. Reardon D, Hoffman JR, Mangine GT, et al. Do Changes in Muscle Architecture Affect Post-Activation Potentiation?  
485 *Journal of Sports Science & Medicine*. 2014; 13 (3), 483 – 492. PMID: 25178394
- 486 13. Liu M., and Guo L. The Post-activation Potentiation Effect on Muscle Activation of Athletes at Different Training  
487 Levels. *China Sport Science and Technology*. 2019; (55)7:30-36. doi: 10.16470/j.csst.2019109
- 488 14. Moore RL, Stull JT. Myosin light chain phosphorylation in fast and slow skeletal muscles in situ. *American Journal of*  
489 *Physiology-Cell Physiology*. 1984; 247(5):C462-C471. doi: 10.1152/ajpcell.1984.247.5.C462
- 490 15. Houston ME, Grange RW. Myosin phosphorylation, twitch potentiation, and fatigue in human skeletal muscle.  
491 *Canadian Journal of Physiology and Pharmacology*. 1990; 68(7): 908-913. doi: 10.1139/y90-139
- 492 16. Chiu LZ, Fry AC, Weiss LW, Schilling BK, Brown LE, Smith SL. Postactivation potentiation response in athletic and  
493 recreationally trained individuals. *The Journal of Strength & Conditioning Research*. 2003; 17(4): 671-677.
- 494 17. Wang A. and Zhang X. Theroretical exploration and practical process of strength training: physiology mechanism of  
495 post-activation potentiation. *China School Physical Education(Higher Education)*. 2014; 1(10): 80-83. Available at:  
496 <https://www.cnki.com.cn/Article/CJFDTotat-TYGJ201410017.htm>
- 497 18. Rassier DE, Macintosh BR. Coexistence of potentiation and fatigue in skeletal muscle. *Brazilian Journal of Medical*  
498 *and Biological Research*. 2000; 33:499-508. doi: 10.1590/S0100-879X2000000500003
- 499 19. PaĖaĖsuke M, Ereline J, Gapeyeva H. Twitch contractile properties of plantar flexor muscles in power and endurance

- 500 trained athletes. *European journal of applied physiology and occupational physiology*. 1999; 80:448- 451. doi:
- 501 [10.1007/s004210050616](https://doi.org/10.1007/s004210050616)
- 502 20. Güllich A, Schmidtbleicher D. MVC-induced short-term potentiation of explosive force. *New studies in athletics*. 1996;
- 503 11:67-84.
- 504 21. Aagaard P. Training-induced changes in neural function. *Exercise and sport sciences reviews*. 2003; 31(2):61-67. doi:
- 505 [10.1097/00003677-200304000-00002](https://doi.org/10.1097/00003677-200304000-00002)
- 506 22. Aagaard P, Simonsen EB, Andersen JL, Magnusson P, Dyhre-Poulsen P. Neural adaptation to resistance training:
- 507 changes in evoked V-wave and H-reflex responses. *Journal of applied physiology*. 2002; 92(6):2309-2318. doi:
- 508 [10.1152/jappphysiol.01185.2001](https://doi.org/10.1152/jappphysiol.01185.2001)
- 509 23. Folland JP, Williams AG. The Adaptations to Strength Training: Morphological and Neurological Contributions to
- 510 Increased Strength. *Sports Medicine*. 2007; 37(2):145-168. doi: [10.2165/00007256-200737020-00004](https://doi.org/10.2165/00007256-200737020-00004)
- 511 24. Mahlfeld K, Franke J, Awiszus F. Postcontraction changes of muscle architecture in human quadriceps muscle. *Muscle*
- 512 *Nerve*. 2004; 29(4):597- 600. doi: [10.1002/mus.20021](https://doi.org/10.1002/mus.20021)
- 513 25. Kumagai K, Abe T, Brechue WF, Ryushi T, Takano S, Mizuno M. Sprint performance is related to muscle fascicle
- 514 length in male 100-m sprinters. *Journal of applied physiology*. Published online 2000. doi: [10.1152/jappl.2000.88.3.811](https://doi.org/10.1152/jappl.2000.88.3.811)
- 515 26. Earp JE, Kraemer WJ, Newton RU, et al. Lower-Body Muscle Structure and Its Role in Jump Performance During
- 516 Squat, Countermovement, and Depth Drop Jumps. *Journal of Strength and Conditioning Research*. 2010; 24(3): 722-
- 517 729. doi: [10.1519/JSC.0b013e3181d32c04](https://doi.org/10.1519/JSC.0b013e3181d32c04)
- 518 27. Weber KR, Brown LE, Coburn JW, Zinder SM. Acute Effects of Heavy-Load Squats on Consecutive Squat Jump
- 519 Performance. *Journal of Strength and Conditioning Research*. 2008; 22(3):726-730. doi: [10.1519/JSC.](https://doi.org/10.1519/JSC.0b013e3181660899)
- 520 [0b013e3181660899](https://doi.org/10.1519/JSC.0b013e3181660899)

- 521 28. French D N, Kraemer W J, Cooke C B. Changes in dynamic exercise performance following a sequence of  
522 preconditioning isometric muscle actions. *The Journal of Strength & Conditioning Research*, 2003, 17(4): 678-685.  
523 doi: 10.1519/1533-4287(2003)017<0678:cidepf>2.0.co;2
- 524 29. McBride JM, Nuzzo JL, Dayne AM, Israetel MA, Nieman DC, Triplett NT. Effect of an acute bout of whole body  
525 vibration exercise on muscle force output and motor neuron excitability. *The Journal of Strength & Conditioning*  
526 *Research*. 2010; 24(1):184-189. doi: 10.1519/JSC.0b013e3 181  
527 9b79cf
- 528 30. Esformes JI, Bampouras TM. Effect of back squat depth on lower-body postactivation potentiation. *The Journal of*  
529 *Strength & Conditioning Research*. 2013; 27(11): 2997-3000. doi: 10.1519/JSC.0b013e31828d4465
- 530 31. Bevan HR, Cunningham DJ, Tooley EP, Owen NJ, Cook CJ, Kilduff LP. Influence of postactivation potentiation on  
531 sprinting performance in professional rugby players. *The Journal of Strength & Conditioning Research*. 2010;  
532 24(3):701-705. doi: 10.1519/JSC.0b013e3181c7b68a
- 533 32. Batista MA, Roschel H, Barroso R, Ugrinowitsch C, Tricoli V. Influence of strength training background on  
534 postactivation potentiation response. *The Journal of Strength & Conditioning Research*. 2011; 25(9):2496-2502. doi:  
535 10.1519/JSC.0b013e318200181b
- 536 33. Matthews MJ, Matthews HP, Snook B. The acute effects of a resistance training warmup on sprint performance.  
537 *Research in Sports Medicine*. 2004; 12(2):151-159. doi: 10.1080/15438620490460503
- 538 34. Crum AJ, Kawamori N, Stone MH, Haff GG. The acute effects of moderately loaded concentric-only quarter squats on  
539 vertical jump performance. *The Journal of Strength & Conditioning Research*. 2012; 26(4):  
540 914-925. doi: 10.1519/JSC.0b013e318248d79c
- 541 35. Tsolakis C, Bogdanis G C. Acute effects of two different warm-up protocols on flexibility and lower limb explosive

- 542 performance in male and female high level athletes. *Journal of sports science & medicine*, 2012; 11(4): 669. PMID:  
543 24150077
- 544 36. Izquierdo M, Häkkinen K, Gonzalez-Badillo J, Ibáñez J, Gorostiaga E. Effects of long-term training specificity on  
545 maximal strength and power of the upper and lower extremities in athletes from different sports. *European Journal of*  
546 *Applied Physiology*. 2002; 87(3):264-271. doi: 10.1007/s004 21-0  
547 02-0628-y
- 548 37. Babault N, Maffiuletti NA, Pousson M. Postactivation Potentiation in Human Knee Extensors during Dynamic Passive  
549 Movements. *Medicine & Science in Sports & Exercise*. 2008; 40(4):735-743. doi: 10.1249/MSS.0b013e31816 0ba54
- 550 38. Hamada T, Sale DG, MacDougall JD, Tarnopolsky MA. Postactivation potentiation, fiber type, and twitch contraction  
551 time in human knee extensor muscles. *Journal of applied physiology*. 2000; 88(6):2131-2137. doi: 10.  
552 1152/jappl.2000.88.6.2131
- 553 39. Liang M, Guo W, Kong Z, and Qu S. Effects of post-activation potentiation intermittent time on counter movement  
554 jump height: a meta-analysis. *Journal of Wuhan Institute of Physical Education*. 2018; 52(2),49-56. Available at:  
555 [xuebao.whsu.edu.cn/CN/abstract/abstract13200.shtml](http://xuebao.whsu.edu.cn/CN/abstract/abstract13200.shtml)
- 556 41. Markovic G, Simek S, Bradic A. Are acute effects of maximal dynamic contractions on upper-body ballistic  
557 performance load specific? *The Journal of Strength & Conditioning Research*. 2008; 22(6):1811-1815. doi: 10.1519/  
558 JSC.0b013e318182227e
- 559 42. Moher D, Liberati A, Tetzlaff J, et al. Preferred reporting items for systematic reviews and meta-analyses: the PRISMA  
560 statement. *International journal of surgery*. 2010; 8(5):336-341. doi: 10.1016/j.ijsu.2010.02.007
- 561 43. Page MJ, McKenzie JE, Bossuyt PM, et al. The PRISMA 2020 statement: an updated guideline for reporting systematic  
562 reviews. *International journal of surgery*. 2021; 88:105906. doi: 10.1016/j.ijsu.2021.105906

- 563 44. Beato M, Stiff A, Coratella G. Effects of postactivation potentiation after an eccentric overload bout on  
564 countermovement jump and lower-limb muscle strength. *The Journal of Strength & Conditioning Research*. 2021; 35(7):  
565 182  
566 5-1832. doi: 10.1519/JSC.0000000000003005
- 567 45. Lum D. Effects of various warm-up protocol on special judo fitness test performance. *The Journal of Strength &*  
568 *Conditioning Research*. 2019; 33(2): 459-465. doi: 10.1519/JSC.0000000000001862
- 569 46. Mola JN, Bruce-Low SS, Burnet SJ. Optimal recovery time for postactivation potentiation in professional soccer players.  
570 *The Journal of Strength & Conditioning Research*. 2014; 28(6):1529-1537. doi: 10.1519/ JS  
571 C.0000000000000313
- 572 47. Guerra Jr MA, Caldas LC, De Souza HL, et al. The acute effects of plyometric and sled towing stimuli with and without  
573 caffeine ingestion on vertical jump performance in professional soccer players. *Journal of the International Society of*  
574 *Sports Nutrition*. 2018; 15(1):51. doi: 10.1186/ s12970-018-0258-3
- 575 48. Villalon-Gasch L, Penichet-Tomas A, Sebastia-Amat S, Pueo B, Jimenez-Olmedo JM. Postactivation performance  
576 enhancement (PAPE) increases vertical jump in elite female volleyball players. *International Journal of Environmental*  
577 *Research and Public Health*. 2022; 19(1):462. doi:  
578 10.3390/ijerph19010462
- 579 49. McCann MR, Flanagan SP. The effects of exercise selection and rest interval on postactivation potentiation of vertical  
580 jump performance. *The Journal of Strength & Conditioning Research*. 2010; 24(5):1285-1291. doi: 10.1519/JS  
581 C.0b013e3181d6867c
- 582 50. Gepfert M, Golas A, Zajac T, Krzysztofik M. The use of different modes of post-activation potentiation (PAP) for  
583 enhancing speed of the slide-step in basketball players. *International Journal of Environmental Research and Public*



- 584 Health. 2020; 17(14):5057. doi: 10.3390/ijerph17145057
- 585 51. Esformes JJ, Keenan M, Moody J, Bampouras TM. Effect of different types of conditioning contraction on upper body  
586 postactivation potentiation. *The Journal of Strength & Conditioning Research*. 2011; 25(1):143-148. doi: 10.1  
587 519/JSC.0b013e3181fef7f3
- 588 52. Creekmur CC, Haworth JL, Cox RH, Walsh MS. Effects of plyometrics performed during warm-up on 20 and 40 m  
589 sprint performance. *The Journal of sports medicine and physical fitness*. 2016; 57(5):550-555. doi: 10.23736 /S0022-  
590 4707.16.06227-7
- 591 53. Low JL, Ahmadi H, Kelly LP, Willardson J, Boullosa D, Behm DG. Prior band-resisted squat jumps improves running  
592 and neuromuscular performance in middle-distance runners. *Journal of Sports Science & Medicine*. 2019; 18(2):301.  
593 PMID: 31191101
- 594 54. Dobbs WC, Toluoso DV, Fedewa MV, Esco MR. Effect of postactivation potentiation on explosive vertical jump: a  
595 systematic review and meta-analysis. *The Journal of Strength & Conditioning Research*. 2019; 33(7):2009-2018. doi:  
596 10.1519/JSC.0000000000002750
- 597 55. Slinde F, Suber C, Suber L, Edwén CE, Svantesson U. Test-retest reliability of three different countermovement  
598 jumping tests. *The Journal of Strength & Conditioning Research*. 2008; 22(2):640-644. doi: 10.1519/JSC.0b013e3181  
599 660475
- 600 56. Gourgoulis V, Aggeloussis N, Kasimatis P, Mavromatis G, Garas A. Effect of a Submaximal Half-Squats Warm-up  
601 Program on Vertical Jumping Ability. . *The Journal of Strength & Conditioning Research*. 2003; 17(2):342. doi:  
602 10.1519/1533-4287(2003)017<0342:EOASHW>2.0.CO;2
- 603 57. Weber KR, Brown LE, Coburn JW, Zinder SM. Acute effects of heavy-load squats on consecutive squat jump  
604 performance. *The Journal of Strength & Conditioning Research*. 2008; 22(3):726-730. doi: 10.1519/JSC.0b013e3181

- 605                   660899
- 606           58.   Markovic G, Simek S, Bradic A. Are acute effects of maximal dynamic contractions on upper-body ballistic
- 607                   performance load specific? *The Journal of Strength & Conditioning Research*. 2008; 22(6):1811-1815. doi: 10.1519/
- 608                   JSC.0b013e318182227e
- 609           59.   Kilduff LP, Bevan HR, Kingsley MI, et al. Postactivation potentiation in professional rugby players: Optimal recovery.
- 610                   *The Journal of Strength & Conditioning Research*. 2007; 21(4):1134-1138.
- 611           60.   Hamada T, Sale DG, MacDougall JD, Tarnopolsky MA. Postactivation potentiation, fiber type, and twitch contraction
- 612                   time in human knee extensor muscles. *Journal of applied physiology*. Published online 2000. doi: 10.1152/
- 613                   jappl.2000.88.6.2131
- 614           61.   Paasuke M, Ereline J, Gapeyeva H, Torop T. Twitch contractile properties of plantarflexor muscles in female power-
- 615                   trained athletes. *Medicina dello Sport*. 2002; 55(4):279-286.
- 616           62.   Baechele TR, Earle RW. *Essentials of Strength Training and Conditioning*. Human kinetics; 2008.
- 617           63.   Khamoui AV, Brown LE, Coburn JW, et al. Effect of potentiating exercise volume on vertical jump parameters in
- 618                   recreationally trained men. *The Journal of Strength & Conditioning Research*. 2009; 23(5):1465-1469. doi:
- 619                   10.1519/JSC.0b013e3181a5bcdd
- 620           64.   Lesinski M, Mühlbauer T, Büsch D, Granacher U. Effects of complex training on strength and speed performance in
- 621                   athletes: a systematic review. *Effects of complex training on athletic performance*. *Sportverletzung Sportschaden: Organ*
- 622                   *der Gesellschaft für Orthopädisch-Traumatologische Sportmedizin*. 2014; 28(2):85-107. doi:10.1055/s-0034-1366145
- 623           65.   Healy R, Comyns TM. The application of postactivation potentiation methods to improve sprint speed. *Strength and*
- 624                   *Conditioning Journal*. 2017; 39(1):1-9. doi: 10.1519/SSC.0000000000000276
- 625           66.   Crewther BT, Kilduff LP, Cook CJ, Middleton MK, Bunce PJ, Yang GZ. The acute potentiating effects of back squats

- 626 on athlete performance. *The Journal of Strength & Conditioning Research*. 2011; 25(12):3319-3325. doi: 10.1519/  
627 JSC.0b013e318215f560
- 628 67. McBride JM, Nimphius S, Erickson TM. The acute effects of heavy-load squats and loaded countermovement jumps on  
629 sprint performance. *The Journal of Strength & Conditioning Research*. 2005;19(4):893-897. doi:10. 1519/R-16304.1
- 630 68. Comyns TM, Harrison AJ, Hennessy LK, Jensen RL. The optimal complex training rest interval for athletes from  
631 anaerobic sports. *The Journal of Strength & Conditioning Research*. 2006; 20(3):471-476. doi: 10.1519/18445  
632 .1
- 633 69. Simperingham K, Cronin J, Pearson S, Ross A. Acute changes in sprint running performance following ballistic exercise  
634 with added lower body loading. *Journal of Australian Strength and Conditioning*. 2015; 23(6): 86-89.
- 635 70. van den Tillaar R, von Heimburg E. Comparison of different sprint training sessions with assisted and resisted running:  
636 Effects on performance and kinematics in 20-m sprints. *Human Movement*. 2017; 18(2):21-29. doi: 10. 1515/humo-  
637 2017-0013
- 638 71. Smith CE, Hannon JC, McGladrey B, Shultz B, Eisenman P, Lyons B. The effects of a postactivation potentiation  
639 warm-up on subsequent sprint performance. *Human Movement*. 2014; 15(1):36-44. doi: 10.2478/humo- 201  
640 3-0050
- 641 72. Rixon KP, Lamont HS, Bembem MG. Influence of type of muscle contraction, gender, and lifting experience on  
642 postactivation potentiation performance. *The Journal of Strength & Conditioning Research*. 2007; 21(2):500-505. doi:  
643 10.1519/R-18855.1
- 644 73. Houston ME, Grange RW. Myosin phosphorylation, twitch potentiation, and fatigue in human skeletal muscle.  
645 *Canadian Journal of Physiology and Pharmacology*. 1990; 68(7):908-913. doi: 10.1139/y90-139
- 646 74. Seitz LB, de Villarreal ES, Haff GG. The temporal profile of postactivation potentiation is related to strength level. *The*

- 647 Journal of Strength & Conditioning Research. 2014; 28(3):706-715. doi: 10.1519/JSC.0b013e3182a 73ea3
- 648 75. Silva RA, Silva-Júnior FL, Pinheiro FA, Souza PF, Boullosa DA, Pires FO. Acute prior heavy strength exercise bouts  
649 improve the 20-km cycling time trial performance. The Journal of Strength & Conditioning Research. 2014; 28(9):2513-  
650 2520. doi: 10.1519/JSC.0000000000000442
- 651 76. Feros SA, Young WB, Rice AJ, Talpey SW. The effect of including a series of isometric conditioning contractions to  
652 the rowing warm-up on 1,000-m rowing ergometer time trial performance. The Journal of Strength & Conditioning  
653 Research. 2012; 26(12):3326-3334. doi: 10.1519/JSC.0b013e3 182495025
- 654 77. Behm DG. Force Maintenance With Submaximal Fatiguing Contractions. Canadian Journal of Applied Physiology.  
655 2004;29(3):274-290. doi: 10.1139/ h04-019
- 656 78. Hamada T, Sale DG, MacDougall JD, Tarnopolsky MA. Postactivation potentiation, fiber type, and twitch contraction  
657 time in human knee extensor muscles. Journal of Applied Physiology. 2000; 88(6):2131-2137. doi: 10.115  
658 2/jappl.2000.88.6.2131
- 659 79. Hvid LG, Gejl K, Bech RD, et al. Transient impairments in single muscle fibre contractile function after prolonged  
660 cycling in elite endurance athletes. Acta Physiologica. 2013; 208(3):265-273. doi:10.1111/apha.12095
- 661 80. Jones RM, Cook CC, Kilduff LP, et al. Relationship between repeated sprint ability and aerobic capacity in professional  
662 soccer players. The Scientific World Journal. 2013; 2013. doi:10.1155/2013/952350
- 663 81. Gossen ER, Sale DG. Effect of postactivation potentiation on dynamic knee extension performance. European journal  
664 of applied physiology. 2000; 83: 52  
665 4-530. doi:10.1007/s004210000304
- 666 82. Ebben WP, Jensen RL, Blackard DO. Electromyographic and kinetic analysis of complex training variables. The Journal  
667 of Strength & Conditioning Research. 2000; 14(4): 451-456.

668

669

670 **10 Data Availability Statement**

671 The original contributions presented in the study are included in the  
672 article/Supplementary Material, further inquiries can be directed to the corresponding  
673 authors.

674

675

676

677

678

679

680

681

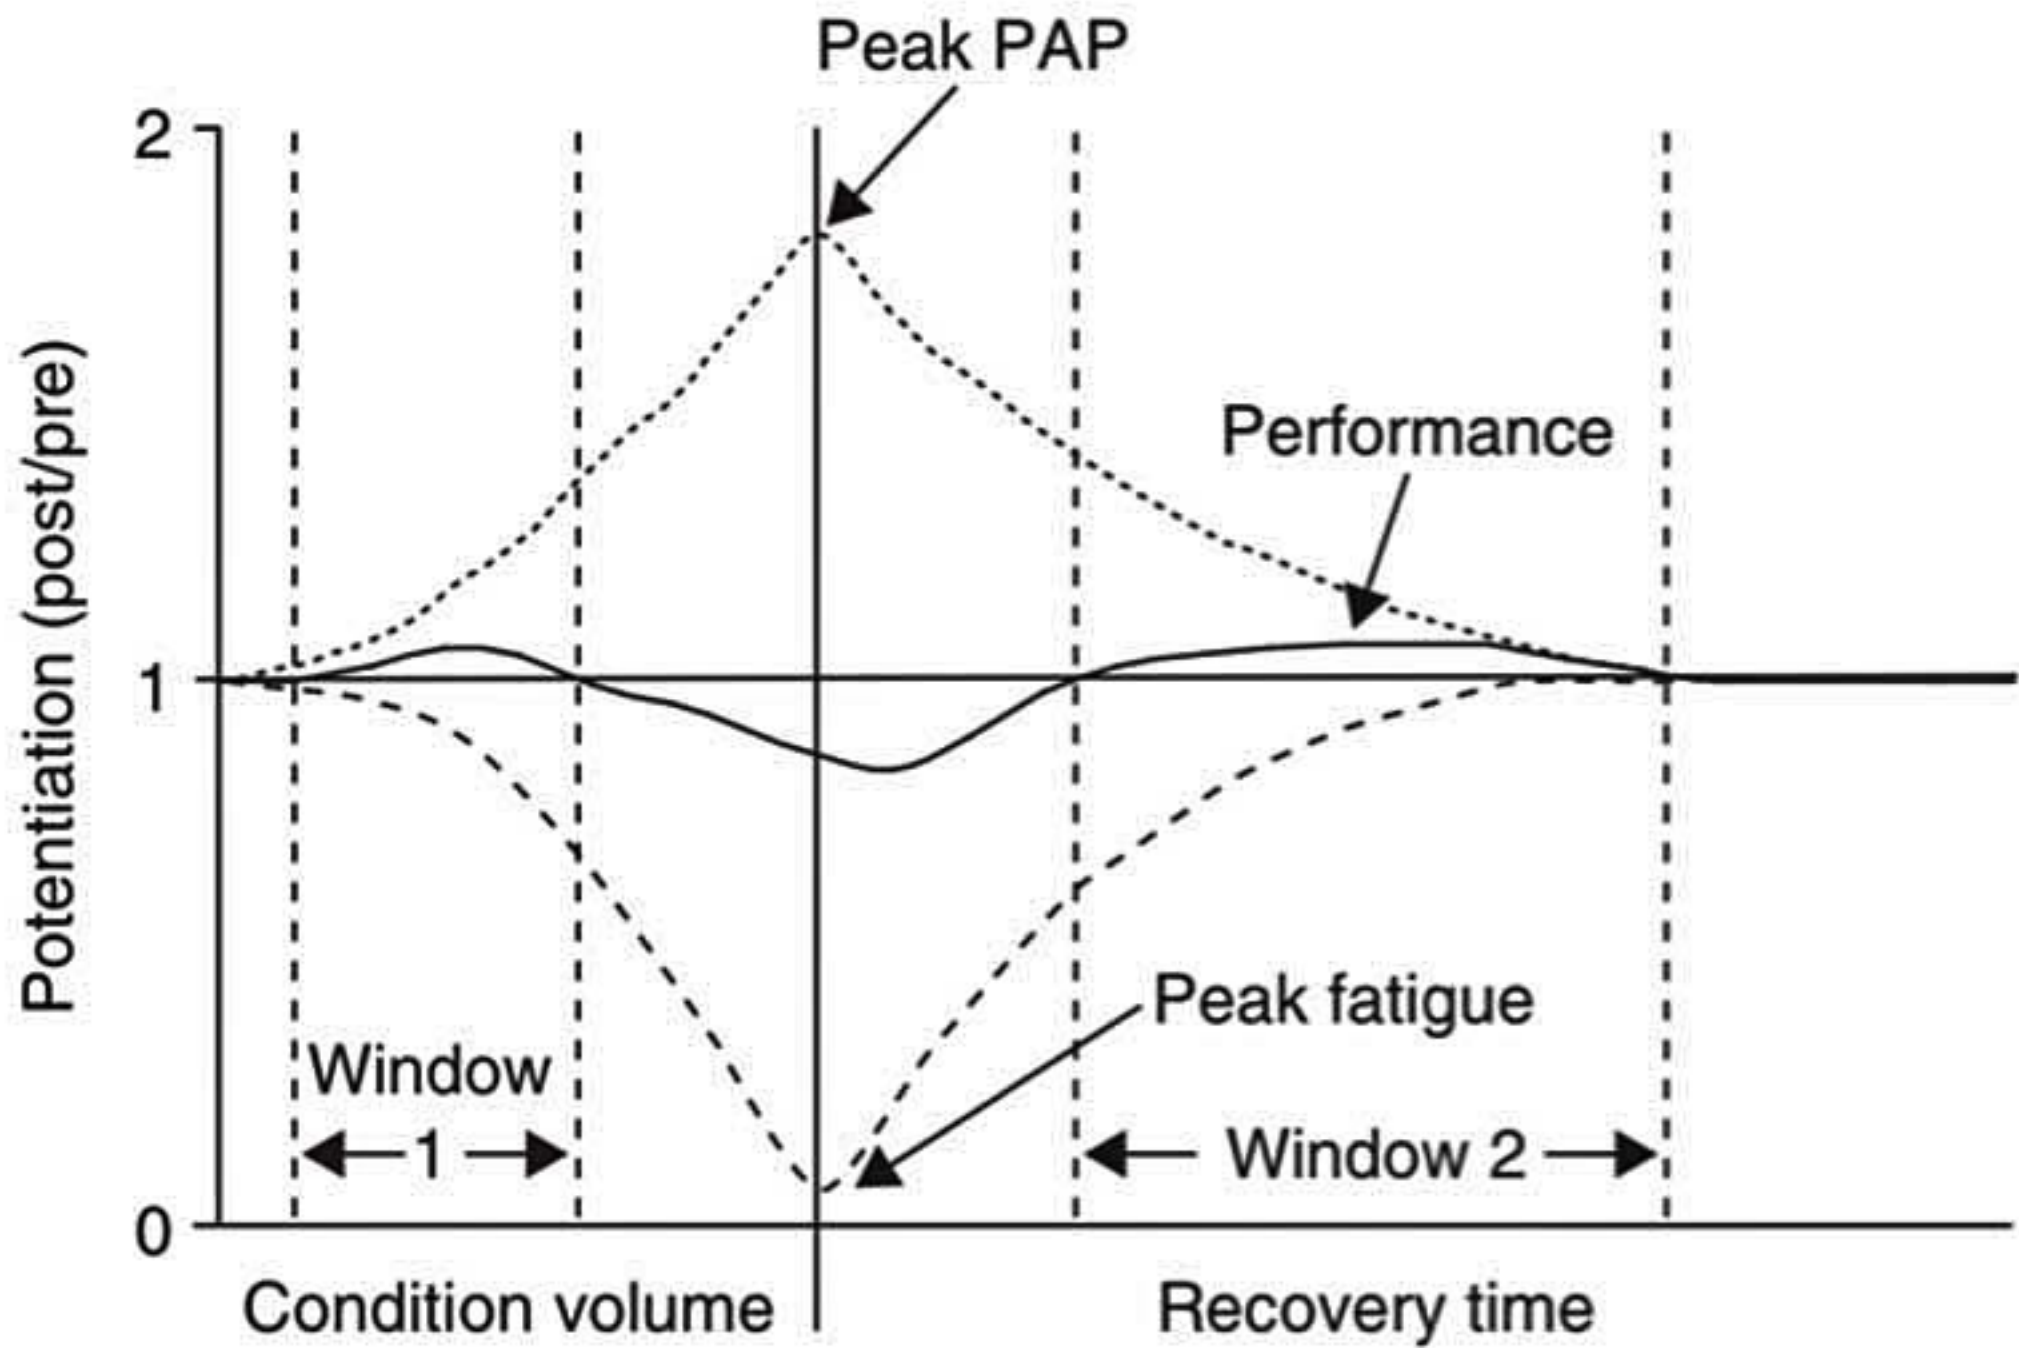

Figure

## Identification of studies via databases and registers

medRxiv preprint doi: <https://doi.org/10.1101/2023.09.01.23294960>; this version posted September 2, 2023. The copyright holder for this preprint (which was not certified by peer review) is the author/funder, who has granted medRxiv a license to display the preprint in perpetuity.

It is made available under a [CC-BY 4.0 International license](https://creativecommons.org/licenses/by/4.0/).

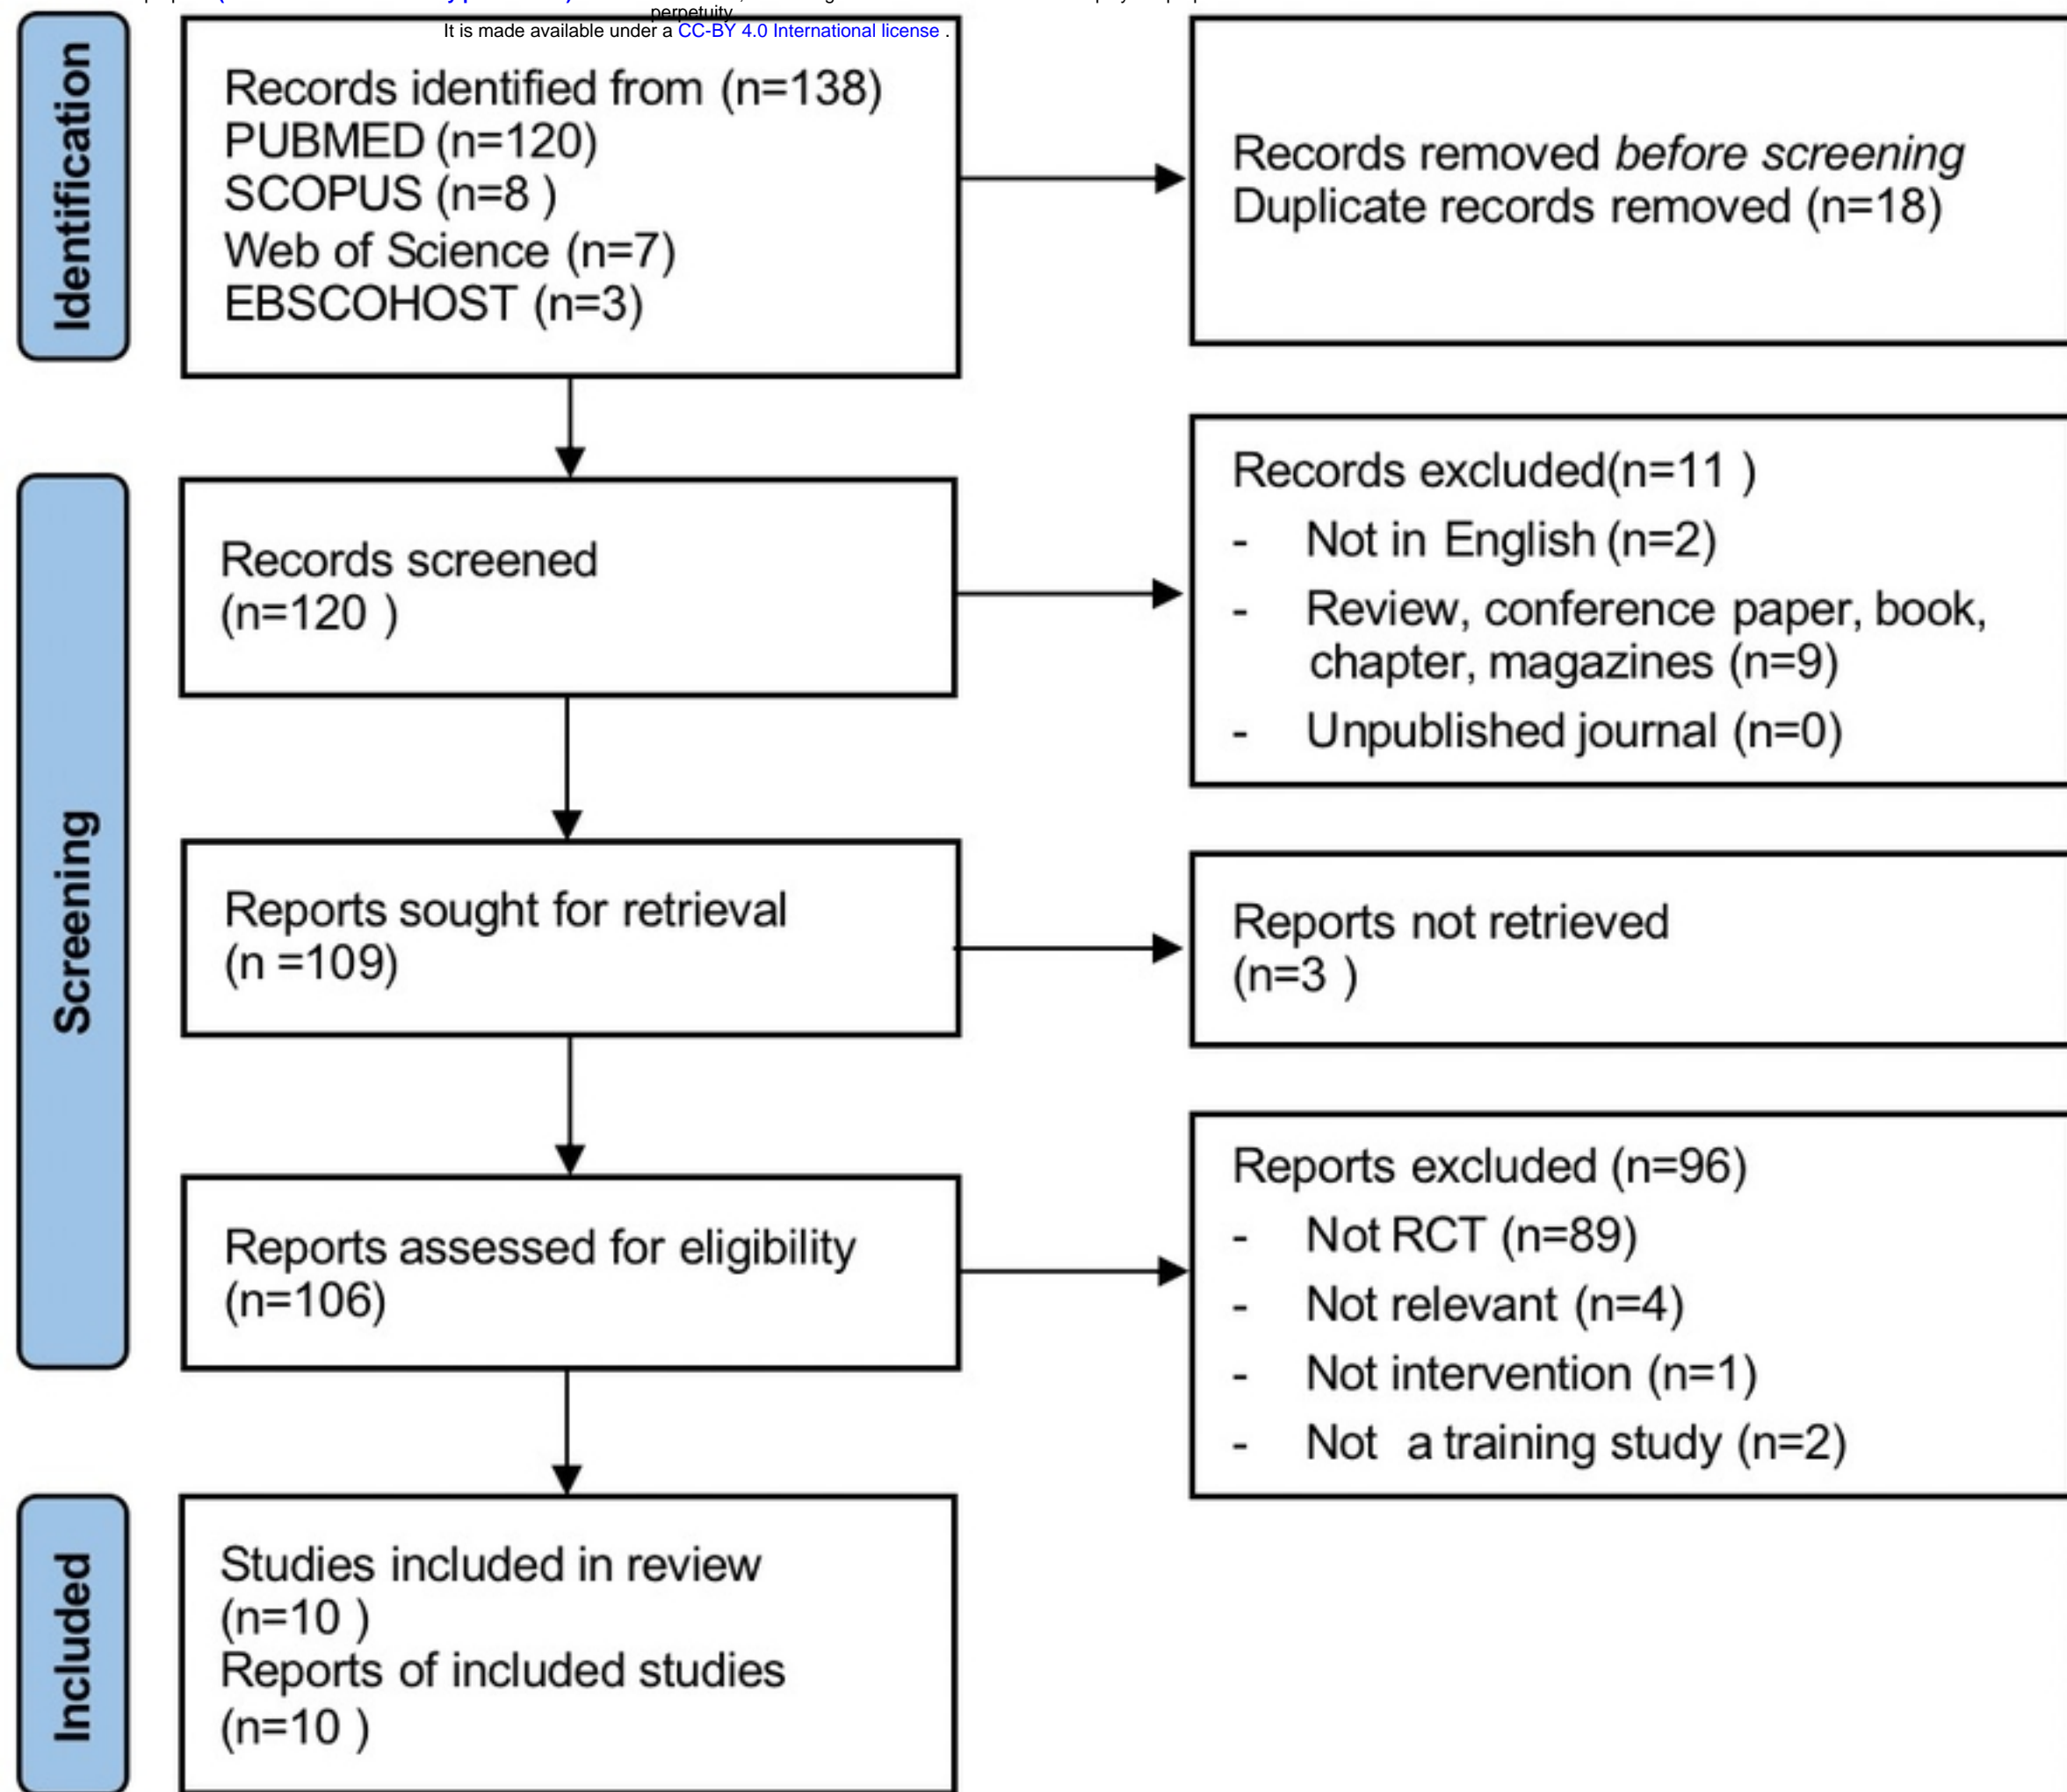

Figure (Prisma flowchart)
